# Supplementary material
Source: ML conference proceedings conference paper supplement (https://openreview.net/forum?id=LYGHdwyXUb)

# Percentage of Shared Behavior

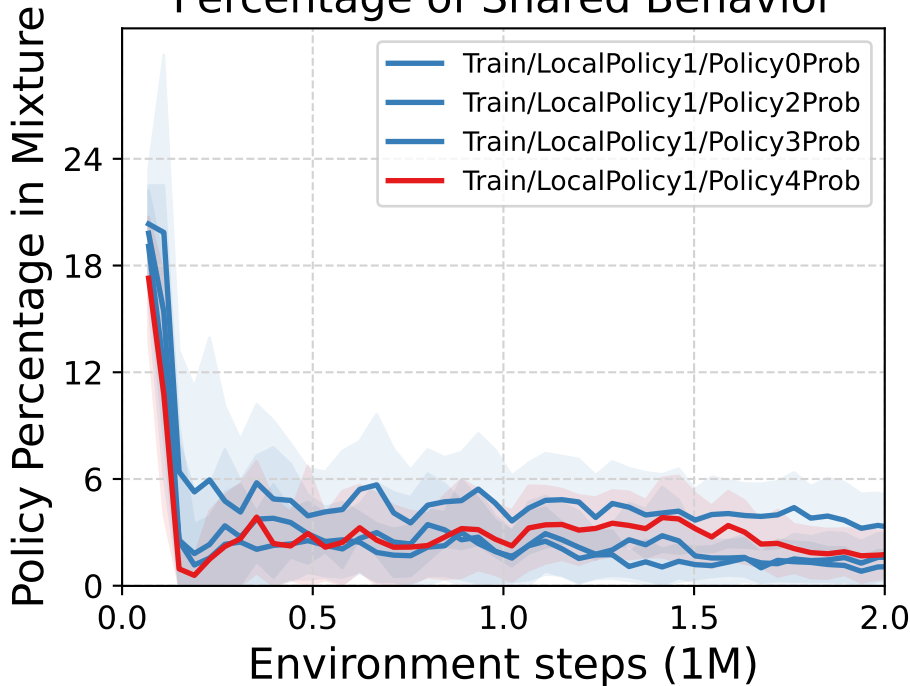

Supplement: supplementary_material [file attachment]

# Meta-World Manipulation

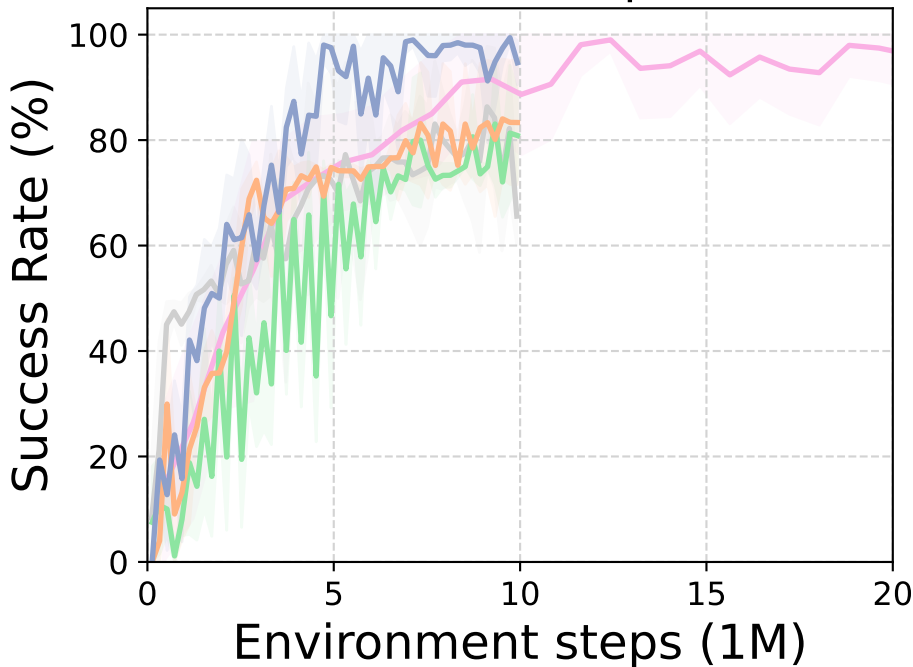

Supplement: supplementary_material [file attachment]

# Multistage Reacher

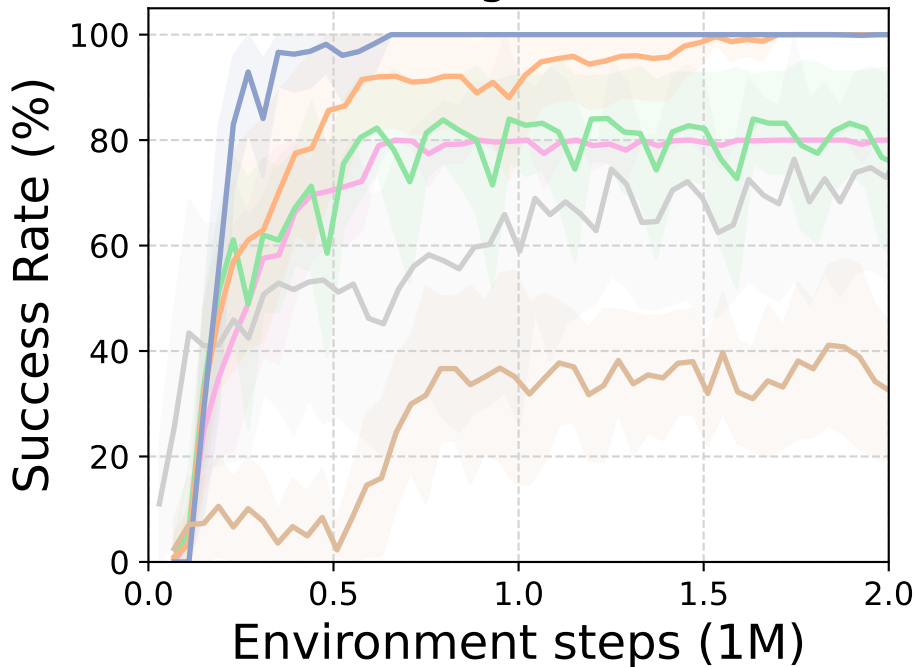

Supplement: supplementary_material [file attachment]

Task 4

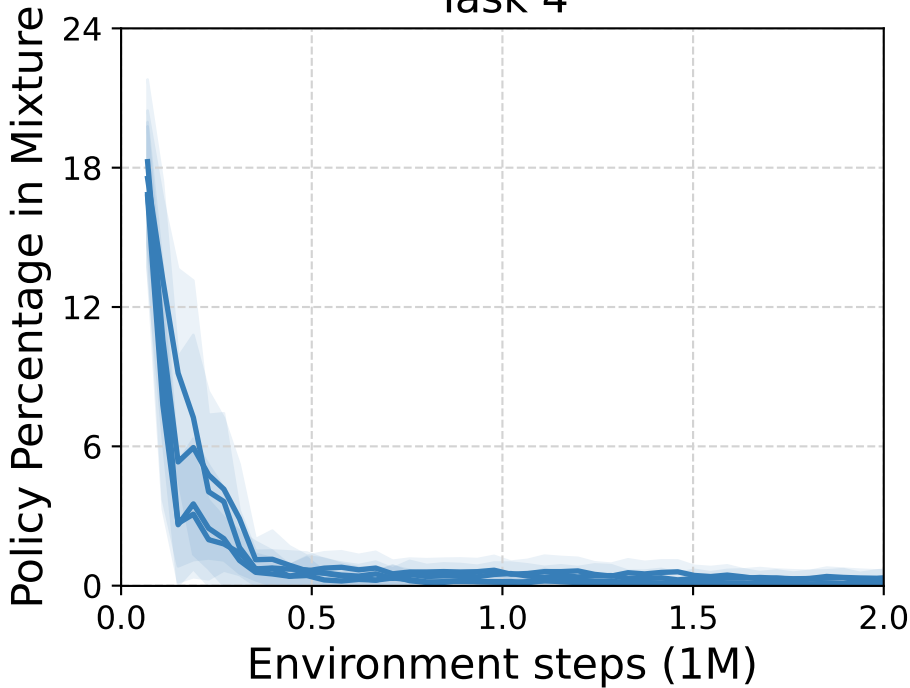

Supplement: supplementary_material [file attachment]

# Meta-World Manipulation

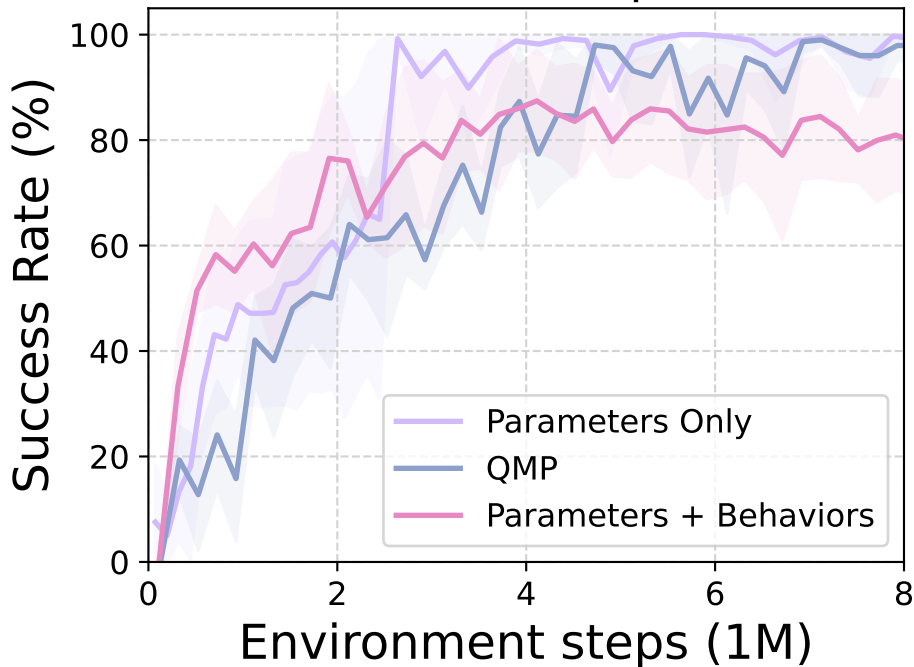

Supplement: supplementary_material [file attachment]

Task 0

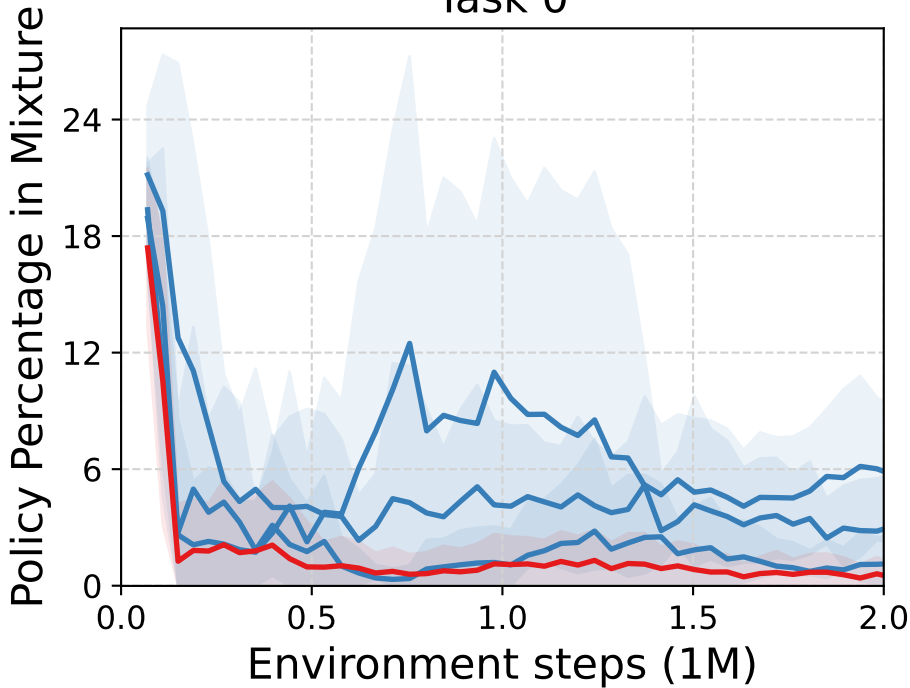

Supplement: supplementary_material [file attachment]

# Percentage of Shared Behavior

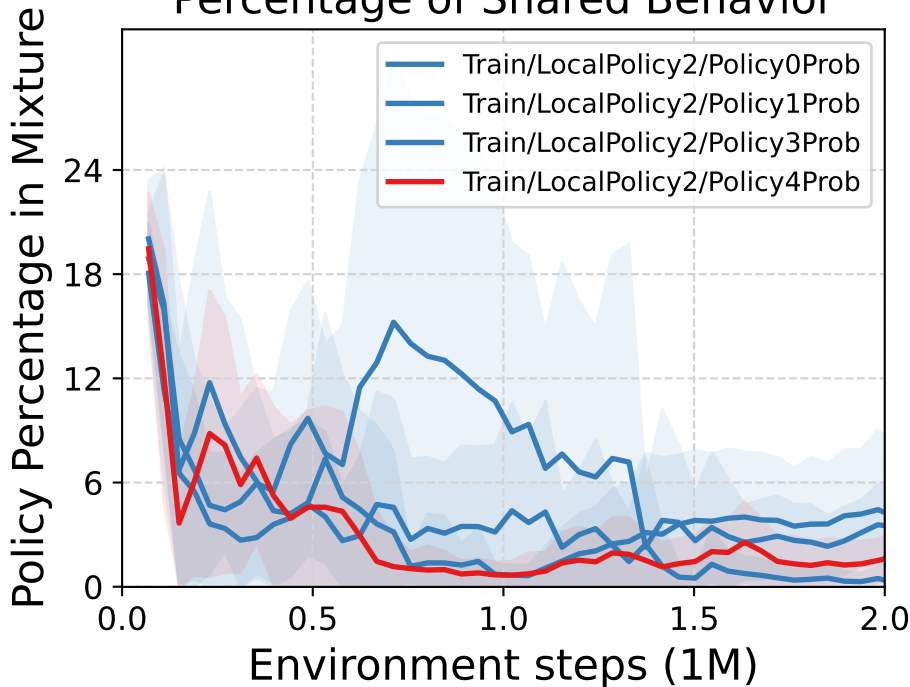

Supplement: supplementary_material [file attachment]

# Multistage Reacher

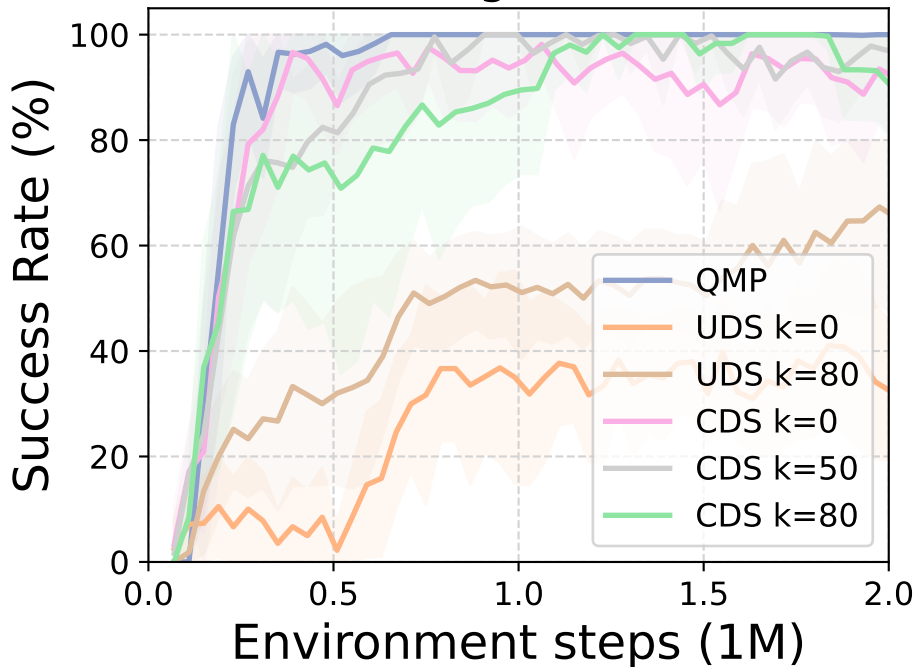

Supplement: supplementary_material [file attachment]

Task 3

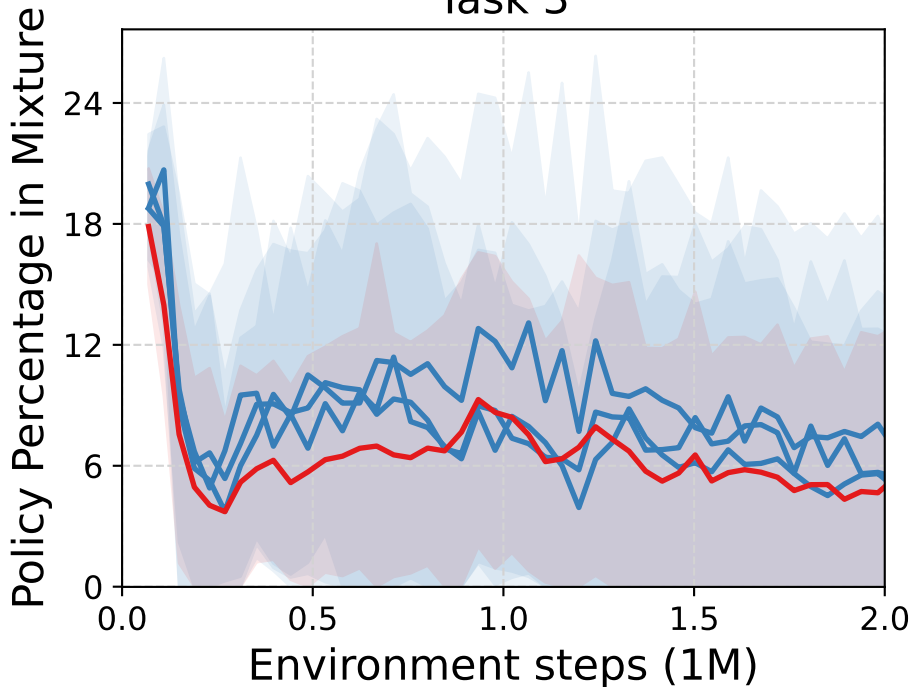

Supplement: supplementary_material [file attachment]

# Meta-World MT10

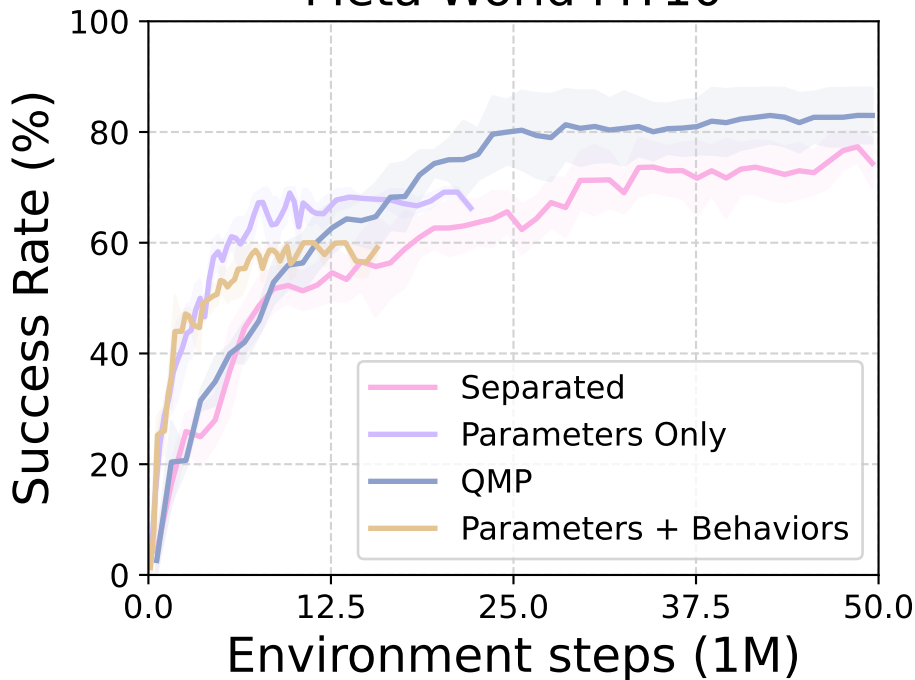

Supplement: supplementary_material [file attachment]

# Percentage of Shared Behavior

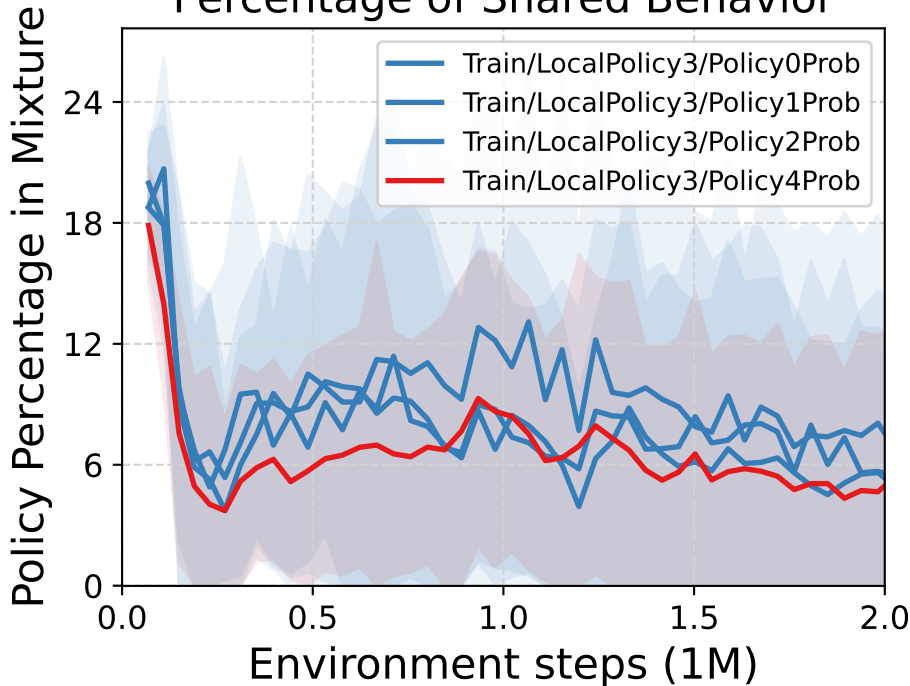

Supplement: supplementary_material [file attachment]

Task 3

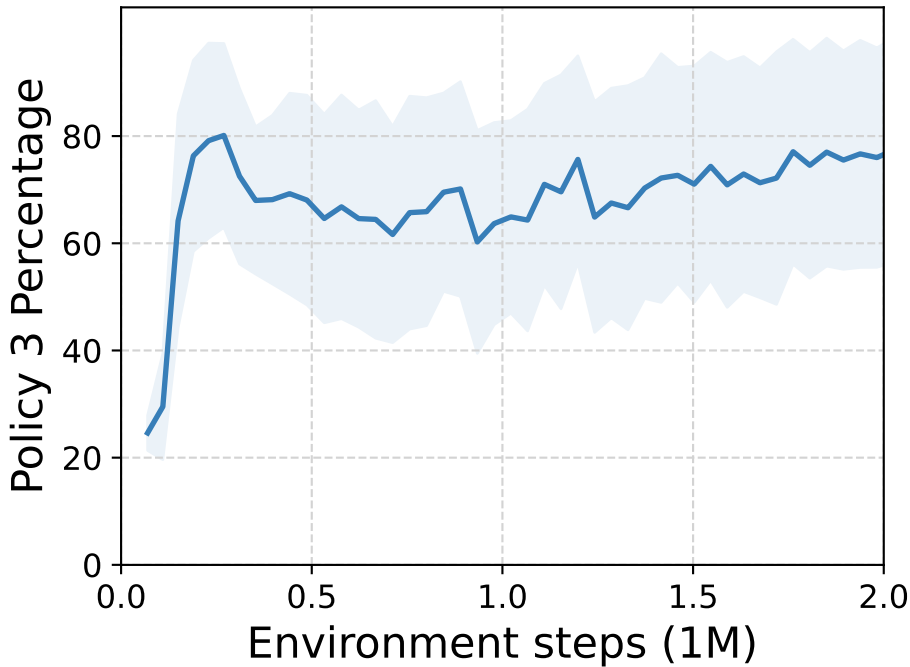

Supplement: supplementary_material [file attachment]

# Meta-World Manipulation

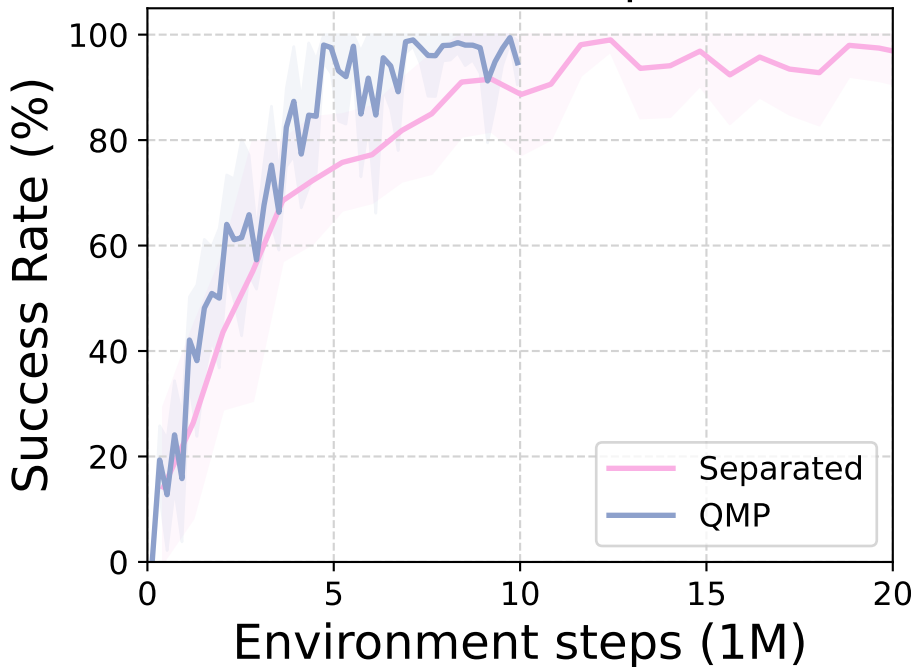

Supplement: supplementary_material [file attachment]

# Percentage of Shared Behavior

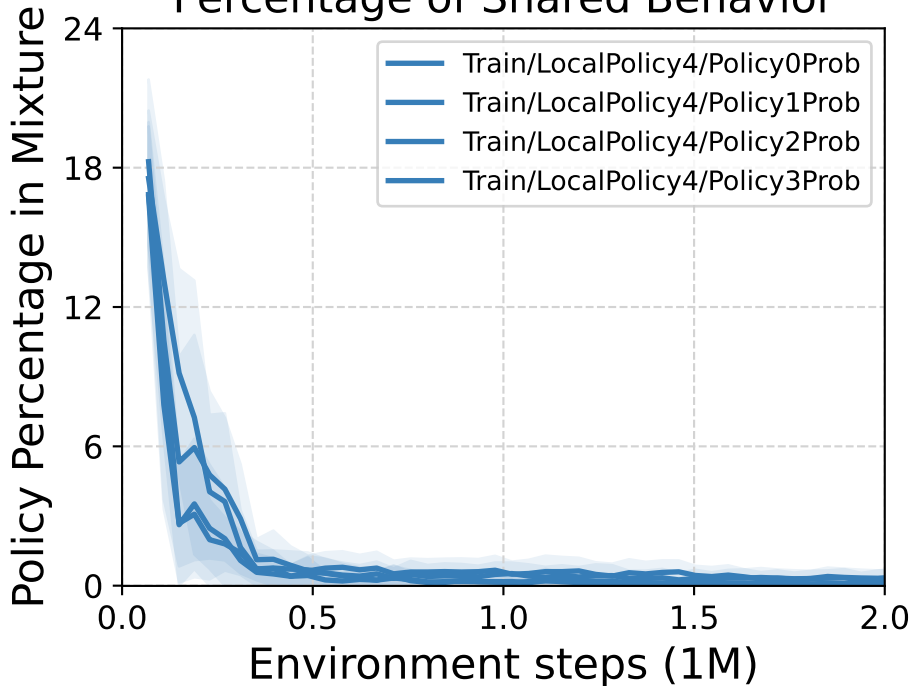

Supplement: supplementary_material [file attachment]

# Multistage Reacher

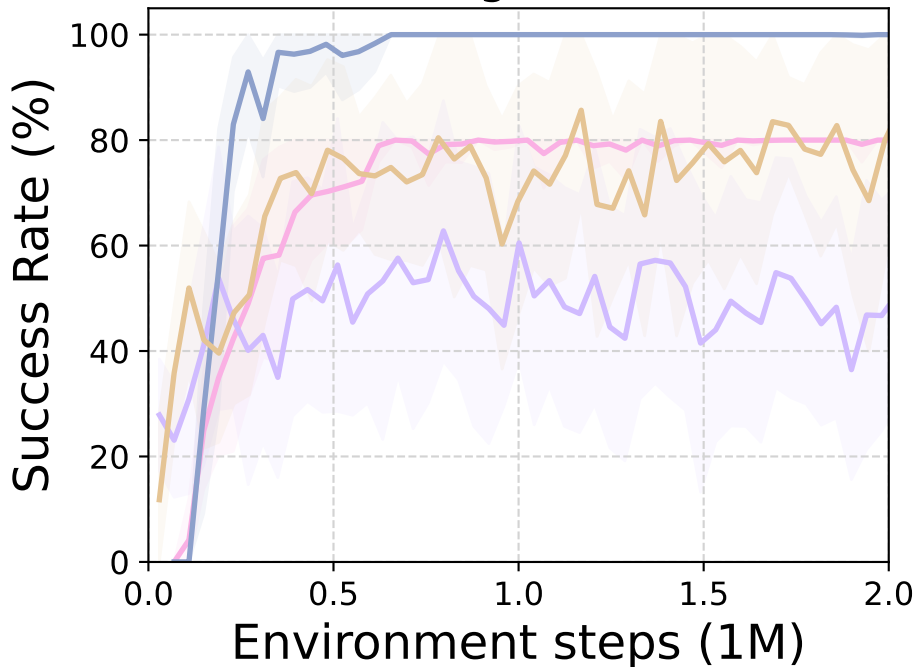

Supplement: supplementary_material [file attachment]

Task 1

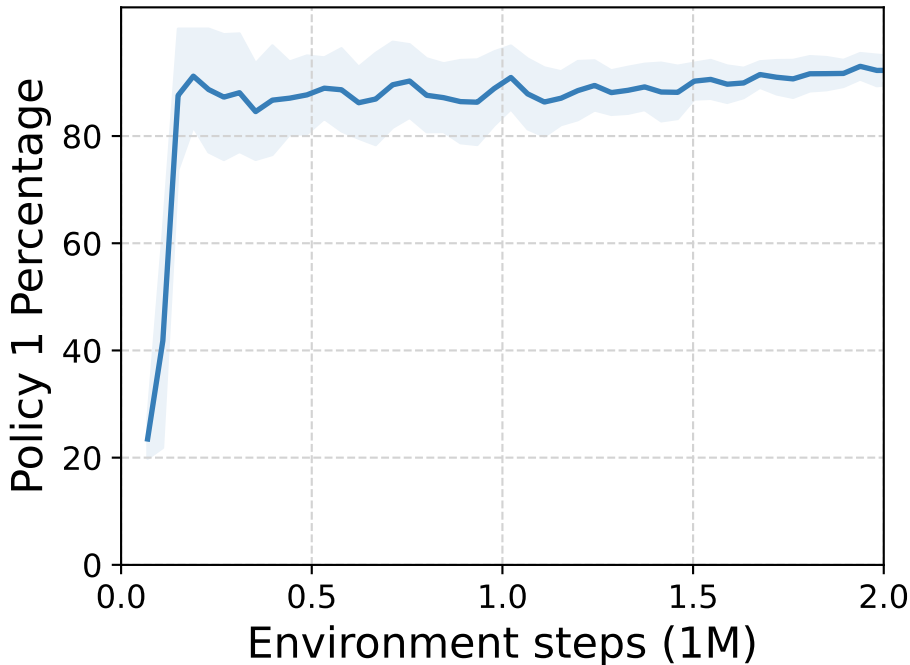

Supplement: supplementary_material [file attachment]

# Multistage Reacher

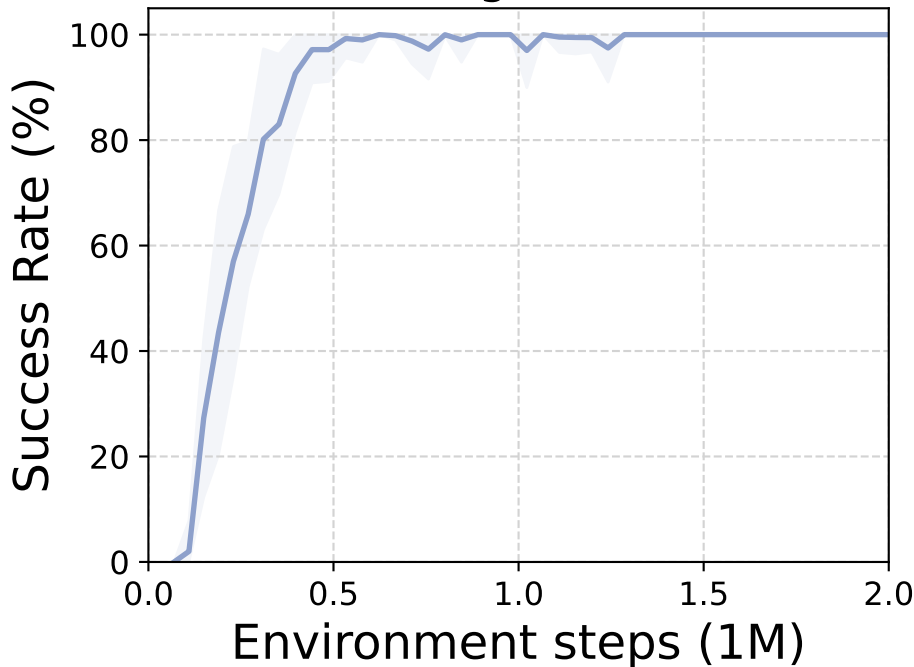

Supplement: supplementary_material [file attachment]

# Multistage Reacher

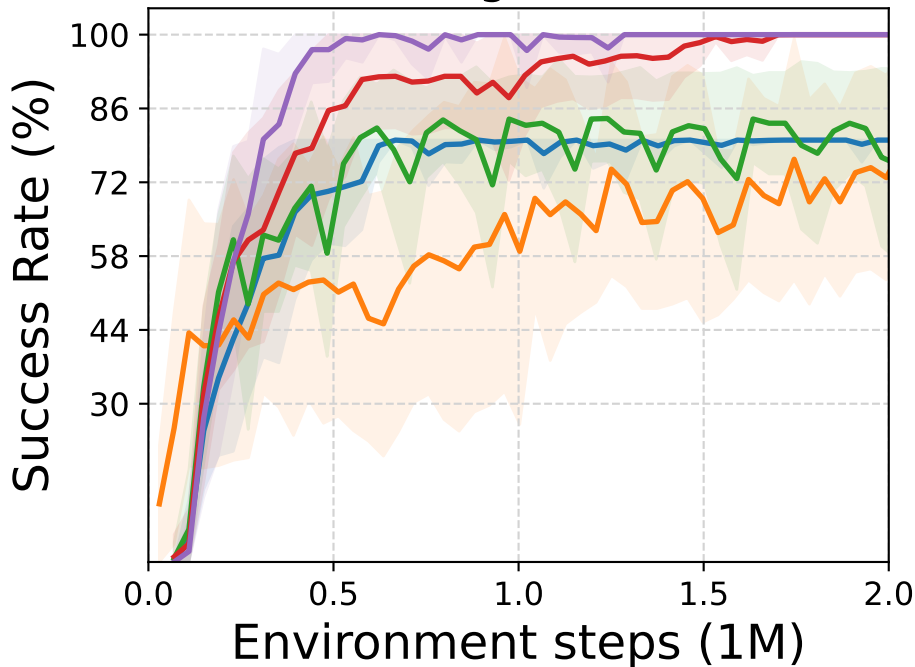

Supplement: supplementary_material [file attachment]

Task 2

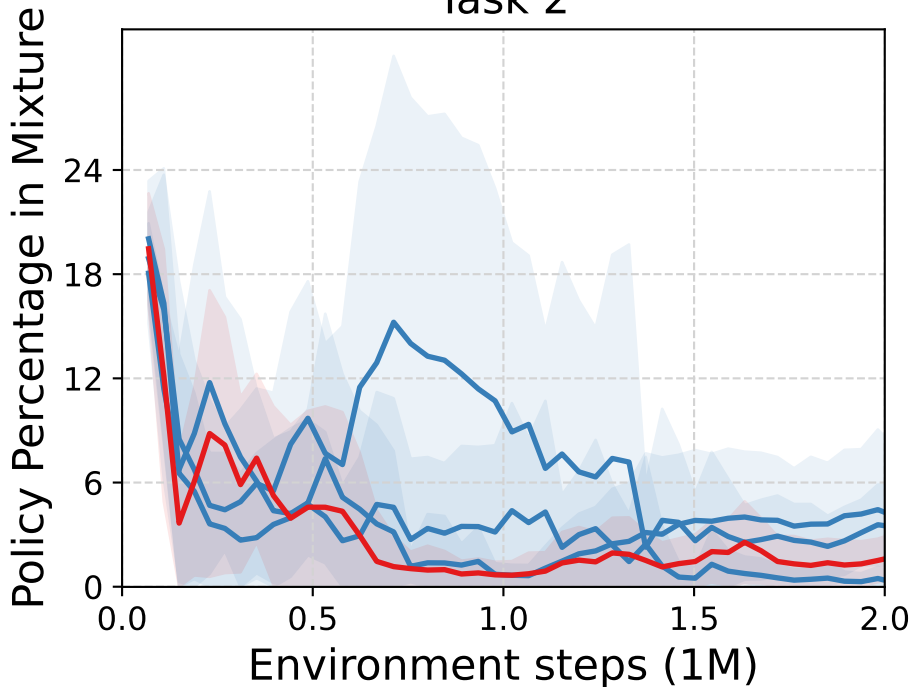

Supplement: supplementary_material [file attachment]

# Multistage Reacher

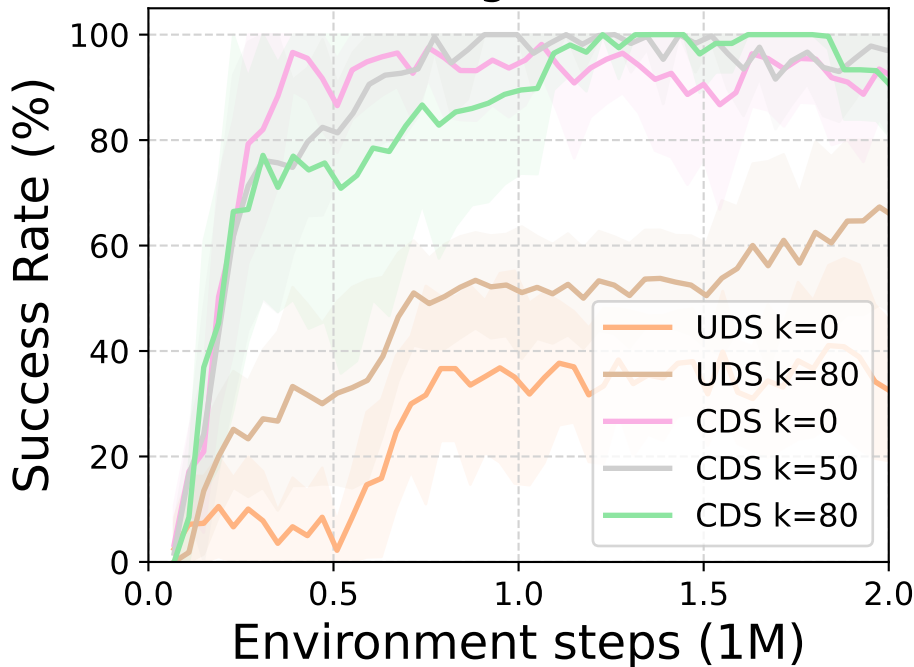

Supplement: supplementary_material [file attachment]

Task 1

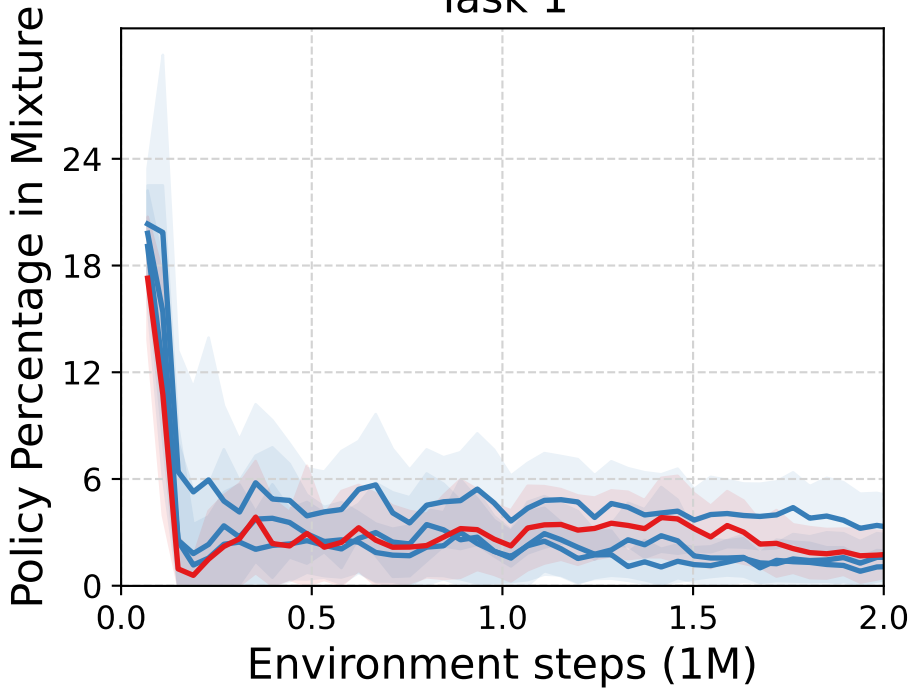

Supplement: supplementary_material [file attachment]

Task 2

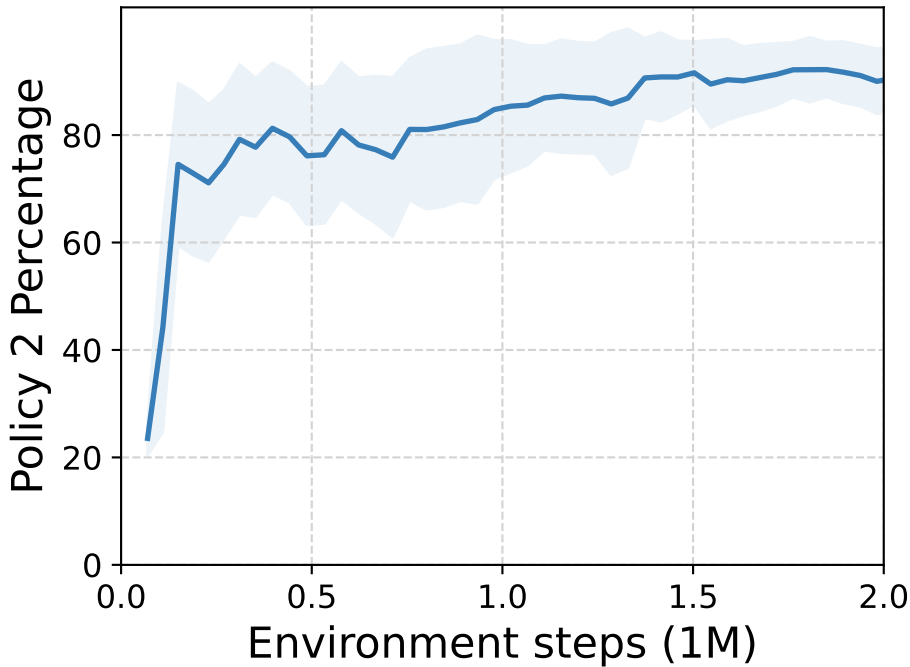

Supplement: supplementary_material [file attachment]

# Meta-World Manipulation

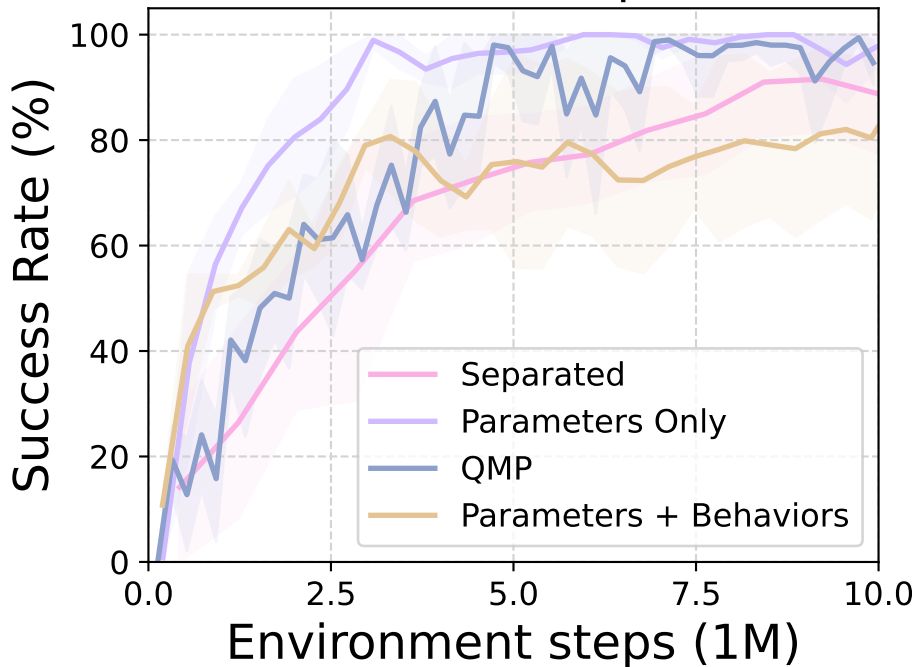

Supplement: supplementary_material [file attachment]

Task 4

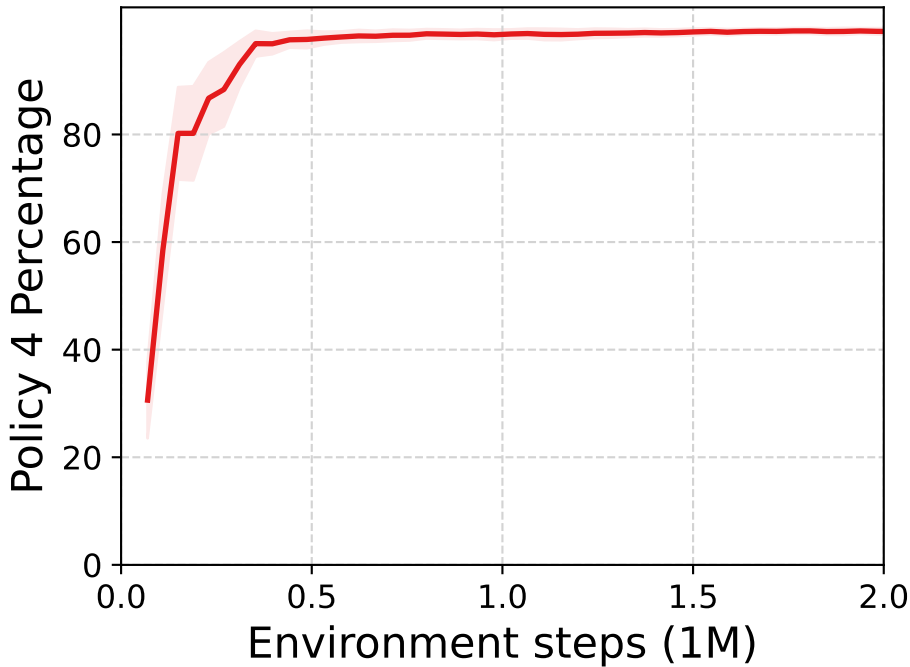

Supplement: supplementary_material [file attachment]

# Multistage Reacher

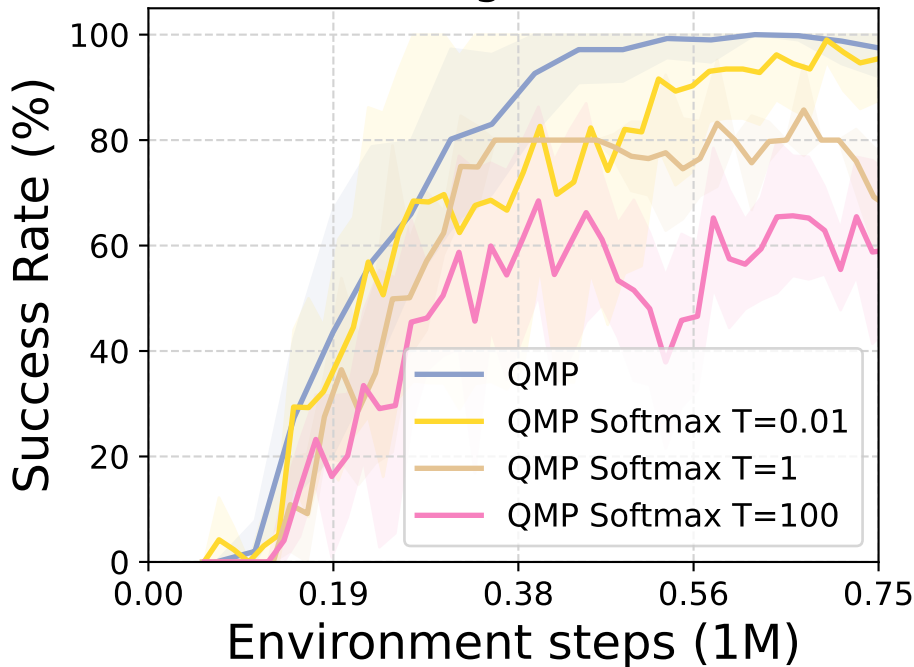

Supplement: supplementary_material [file attachment]

# QMP Behavior Sharing in Task 0

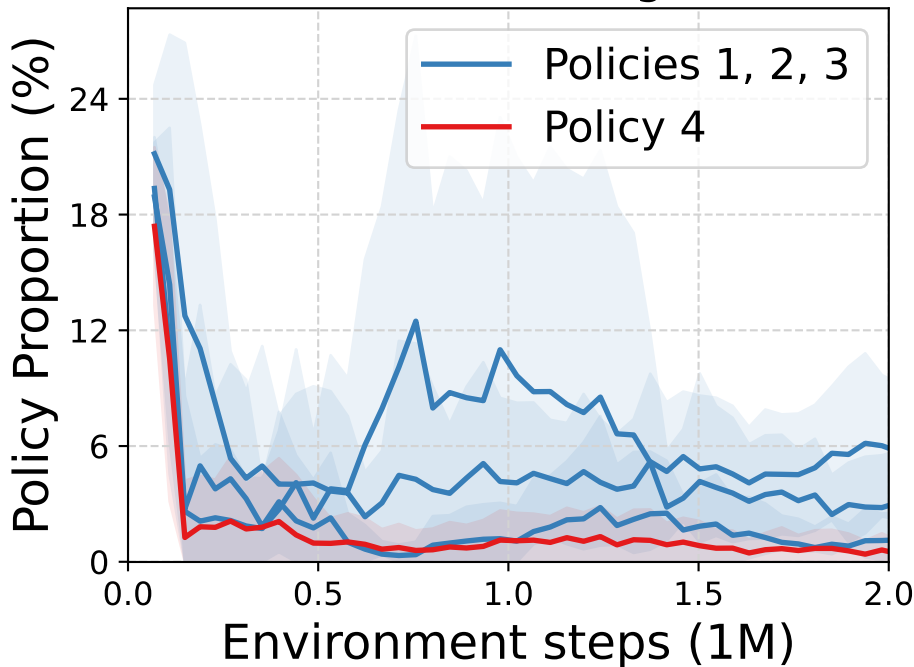

Supplement: supplementary_material [file attachment]

Task 0

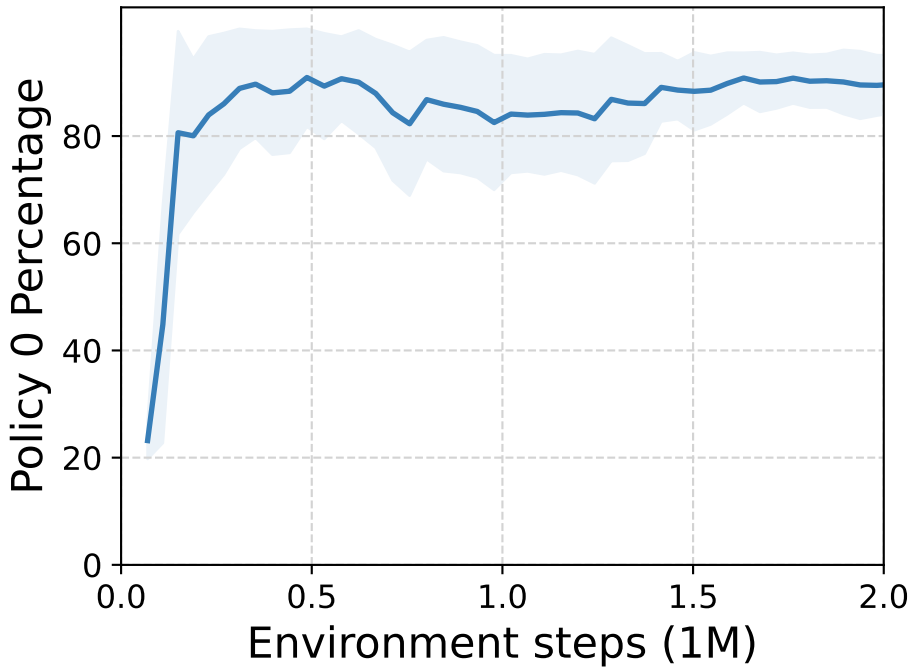

Supplement: supplementary_material [file attachment]

# Multistage Reacher

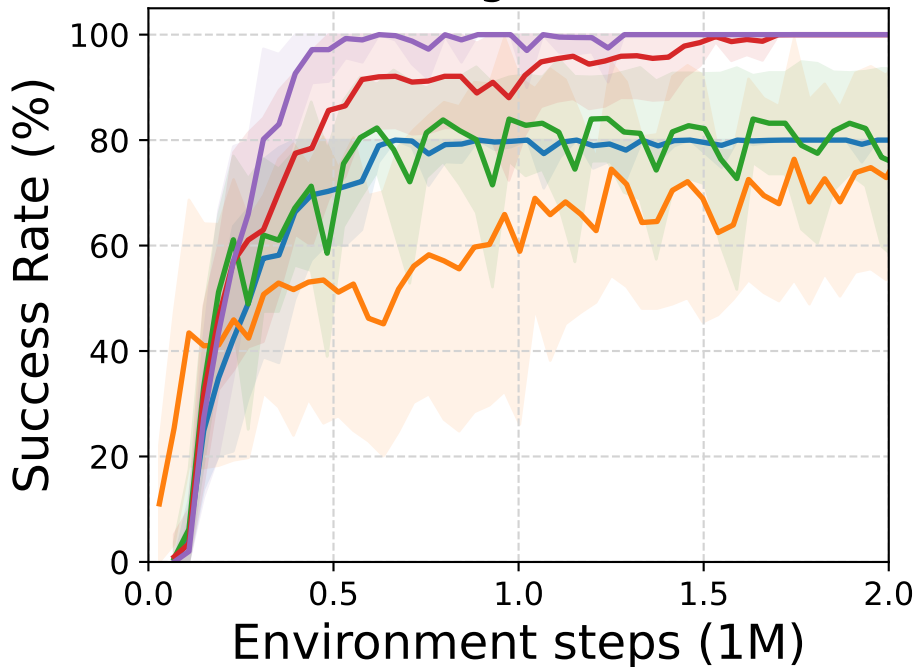

Supplement: supplementary_material [file attachment]
